# Supplementary material for: Surface modification effect on contrast agent efficiency for X-ray based spectral photon-counting scanner/luminescence imaging: from fundamental study to in vivo proof of concept
Source: Royal Society of Chemistry journal article supplement (doi:10.1039/d3nr03710j), 2024-01-01
Supplement: d3nr03710j1.pdf [file d3nr03710j1.pdf]

# Surface modification effect on contrast agent efficiency for X-rays based Spectral Photon-Counting Scanner / Luminescence Imaging: from fundamental study to in vivo proof of concept.

Loic Cuau<sup>a</sup>, Pia Akl<sup>b,c</sup>, A Gautheron<sup>b,d</sup>, Angèle Houmeau<sup>b</sup>, Frédéric Chaput<sup>a</sup>, Ala Yaromina<sup>e</sup>, Ludwig Dubois<sup>e</sup>, Philippe Lambin<sup>e</sup>, Szilvia Karpati<sup>a</sup>, Stephane Parola<sup>a</sup>, B. Rezaeifar<sup>e,f</sup>, Jean-Baptiste Langlois<sup>g</sup>, Salim A. Si-Mohamed<sup>b,c</sup>, Bruno Montcel<sup>b</sup>, Philippe Douek<sup>b,c</sup>, Frederic Lerouge<sup>a\*</sup>

*a* Université de Lyon, Ecole Normale Supérieure de Lyon, CNRS UMR 5182, Université Claude Bernard Lyon 1, Laboratoire de Chimie, 46 allée d'Italie, F69364 Lyon, France

*b* Université de Lyon, INSA-Lyon, Université Claude Bernard Lyon 1, UJM-Saint Etienne, CNRS, Inserm, CREATIS UMR 5220, U1294, F-69621, LYON, France.

*c* Department of Radiology, Hospices Civils de Lyon, 69500 Bron, France.

*d* Université Jean Monnet Saint-Etienne, CNRS, Institut d'Optique Graduate School, Laboratoire Hubert Curien UMR 5516, F-42023, SAINT-ETIENNE, France

*e* Department of Precision Medicine, The M-Lab, GROW – School of Oncology, Maastricht University, Maastricht, 6200, MD, The Netherlands.

*f* Research group NuTeC, Centre for Environmental Sciences, Hasselt University, Diepenbeek, Belgium

*g* CERMEP-imagerie du vivant, 59 boulevard Pinel, 69500 Bron

\* corresponding author

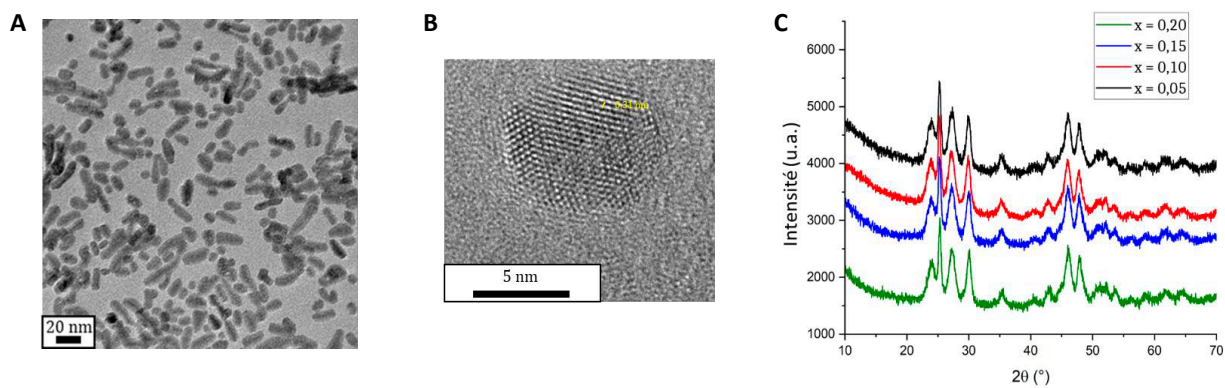

**Fig. S1** Characterization of **NSc**. **A)** TEM image of  $Gd_{0,90}Tb_{0,10}F_3$  composition. **B)** HRTEM of a nanoscintillator with the  $Gd_{0,90}Tb_{0,10}F_3$  composition **C)** Measured XRPD pattern of various composition ( $x$  is the molar ratio of Terbium) corresponding to the orthorhombic phase ( $Pnma$  space group) of  $GdF_3$ .

**Table S1** Theoretical and measured  $Tb^{3+}/Gd^{3+}$  ratio for the various NCs compositions

| Composition             | <i>Theoretical</i> | <i>ICP</i> |
|-------------------------|--------------------|------------|
| $Gd_{0.95}Tb_{0.05}F_3$ | 0,05               | 0,06       |
| $Gd_{0.90}Tb_{0.10}F_3$ | 0,10               | 0,11       |
| $Gd_{0.85}Tb_{0.15}F_3$ | 0,15               | 0,18       |
| $Gd_{0.80}Tb_{0.20}F_3$ | 0,25               | 0,23       |

**Table S2** DLS measurements (hydrodynamic diameters  $D_h$  and Polydispersity index PDI) on the various composition in water (pH=6) and zeta potential (ZP ) measurements.

| Composition                                          | $D_h$ (nm) | PDI  | ZP (mV)   |
|------------------------------------------------------|------------|------|-----------|
| Gd <sub>0.95</sub> Tb <sub>0.05</sub> F <sub>3</sub> | 16 ± 3     | 0,09 | 48 ± 2 mV |
| Gd <sub>0.90</sub> Tb <sub>0.10</sub> F <sub>3</sub> | 13 ± 3     | 0,11 | 45 ± 2 mV |
| Gd <sub>0.85</sub> Tb <sub>0.15</sub> F <sub>3</sub> | 13 ± 3     | 0,10 | 44 ± 2 mV |
| Gd <sub>0.80</sub> Tb <sub>0.20</sub> F <sub>3</sub> | 16 ± 3     | 0,11 | 49 ± 2 mV |

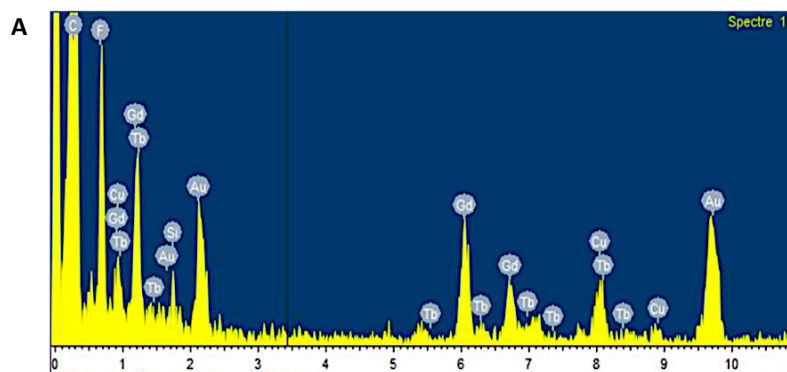

**B**

| Elements | Atomic percentages |
|----------|--------------------|
|----------|--------------------|

|    |       |
|----|-------|
| Gd | 39,21 |
|----|-------|

|    |      |
|----|------|
| Tb | 3.74 |
|----|------|

|   |       |
|---|-------|
| F | 57.11 |
|---|-------|

**Fig. S2** EDX analysis of  $Gd_{0.90}Tb_{0.10}F_3$  composition **A)** Spectrum of the NSc **B)** Analysis results.

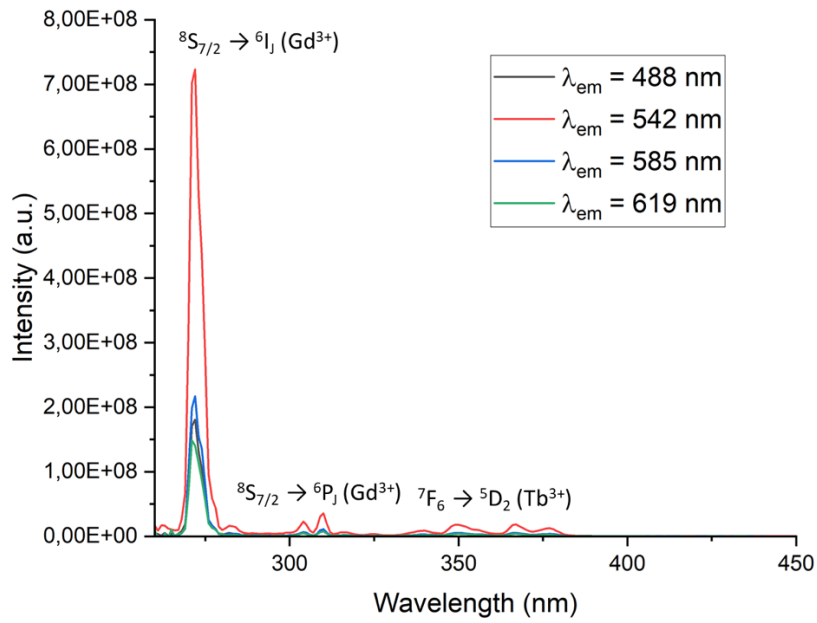

**Fig. S3** Excitation spectra of the  $\text{Gd}_{0.90}\text{Tb}_{0.10}\text{F}_3$  NSC.

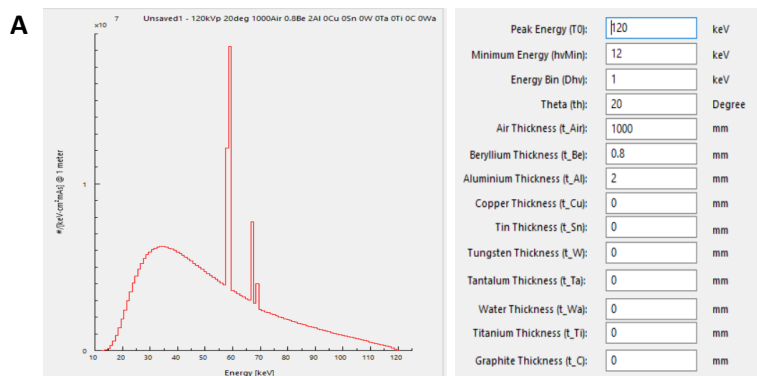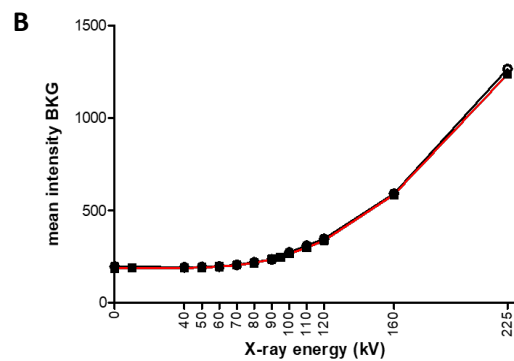

**Fig S4. A)** Spectrum of X-rays with peak energy of 120 keV (obtained using SpekCalc software (PMID: 19724100)). Right : Parameters used for calculation. **B)** Increase in the intensity of background with increasing X-ray energy.

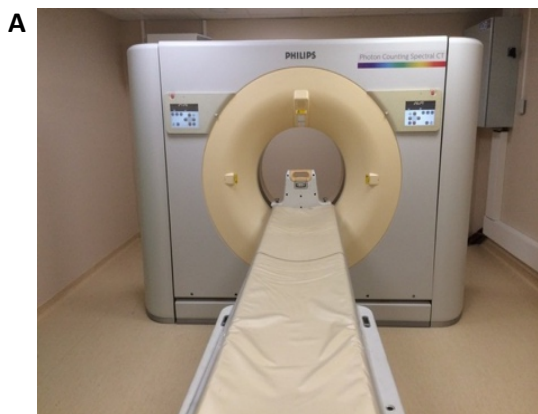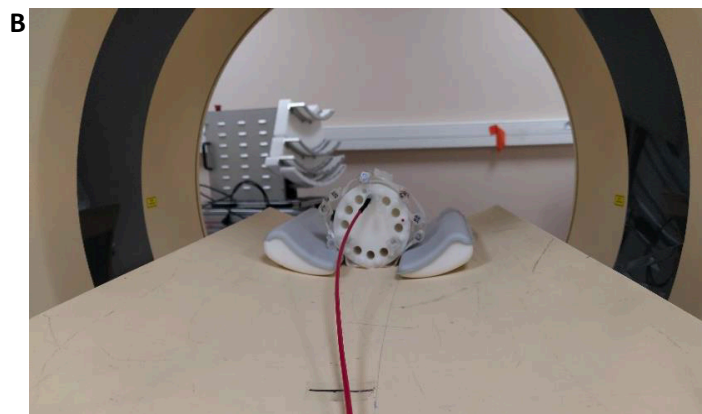

**Fig S5. A)** General picture of the Spectral photo counting scanner CT. **B)** Picture of the experimental setup with optical fiber immersed in a colloidal suspension within an Eppendorf tube. The fiber is linked to a spectrophotometer for luminescence measurements.



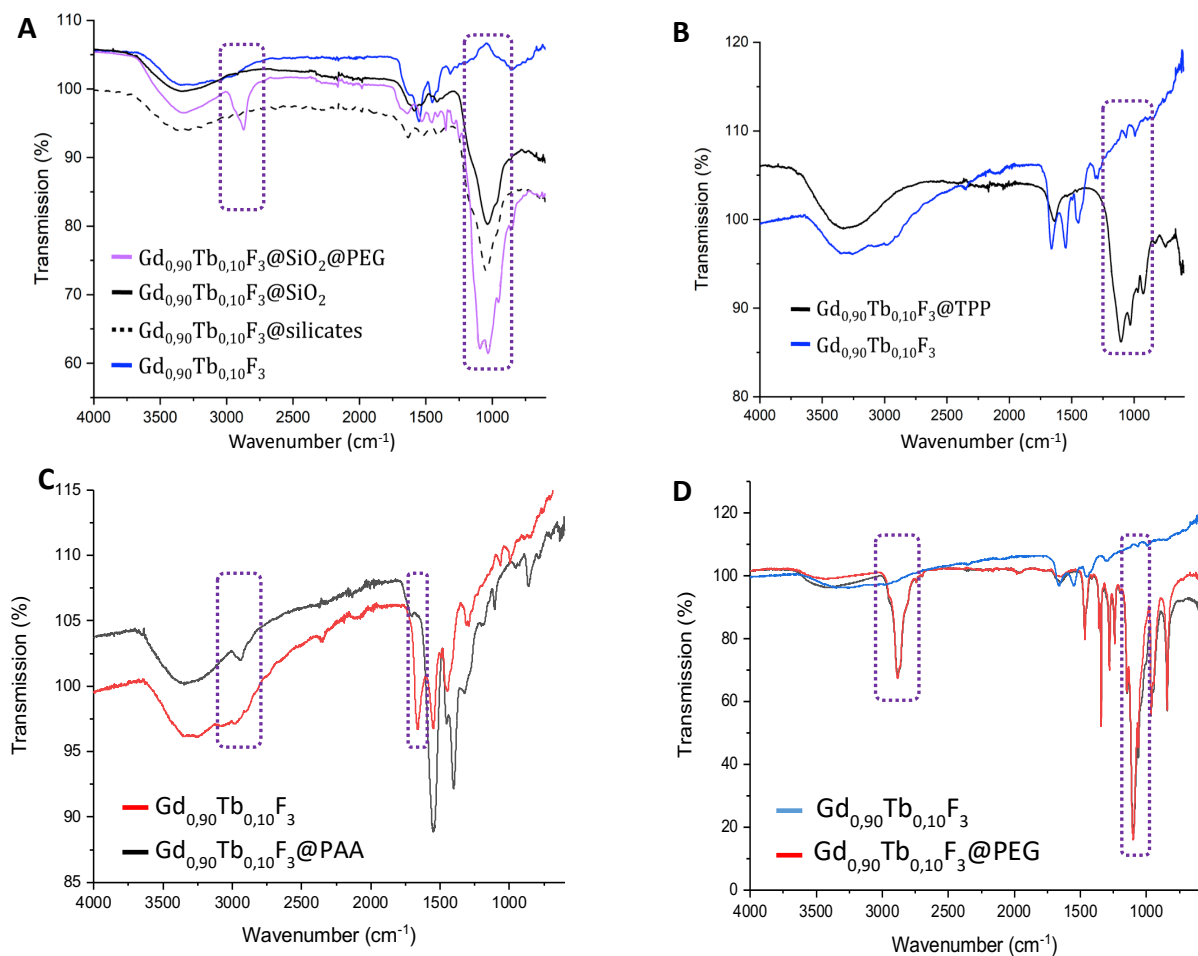

**Fig S6.** FTIR spectra of Gd<sub>0.90</sub>Tb<sub>0.10</sub>F<sub>3</sub> after surface modification, main bands are circled in purple boxes **A)** FTIR monitoring of NSc surface modification with SiO<sub>2</sub>@PEG layer at each steps of the process. **B)** Spectra of the NSc before (blue line) and after (black line) grafting of TPP molecules. **C)** Spectra of the NSc before (red line) and after (black line) grafting of PAA polymer. **D)** Spectra of the NSc before (blue line) and after (red line) grafting of PEG polymer.

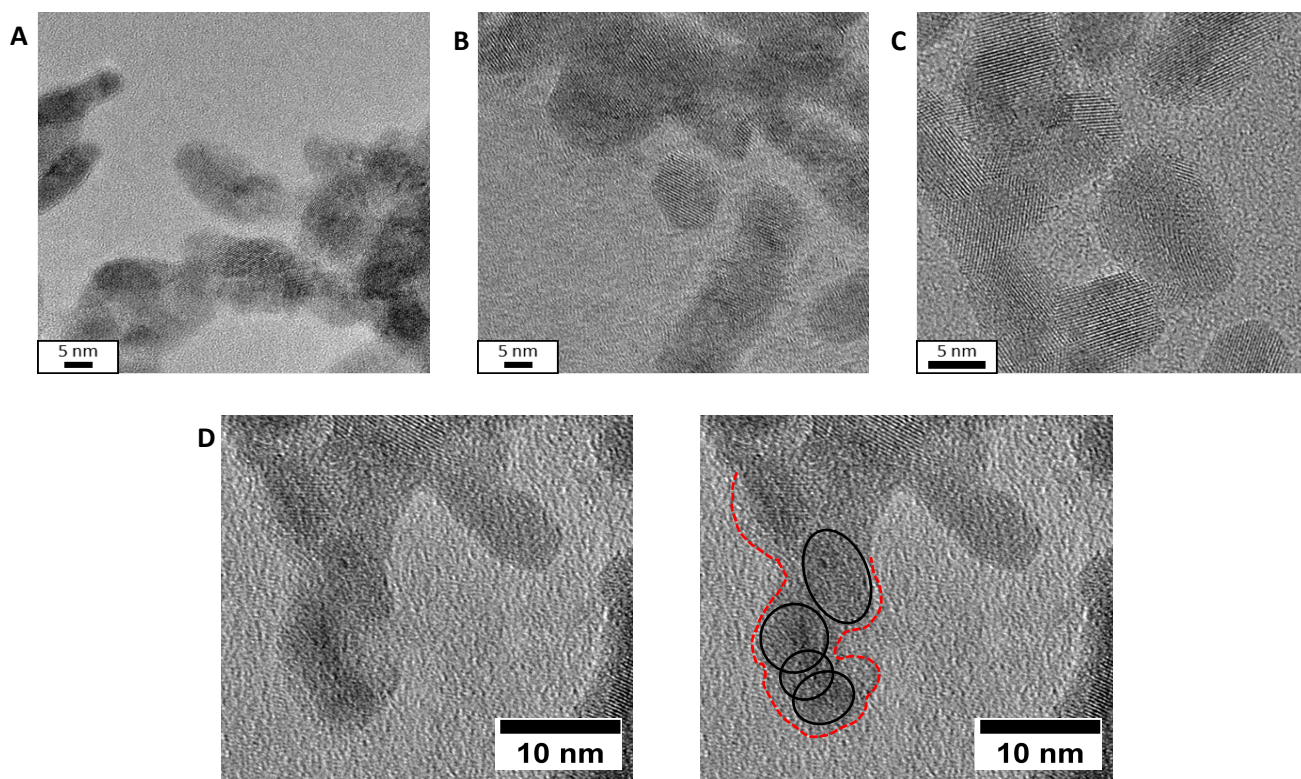

**Fig S7.** HRTEM of  $Gd_{0.90}Tb_{0.10}F_3$  after surface modification with various ligands. **A)**  $Gd_{0.90}Tb_{0.10}F_3@TPP$ . **B)**  $Gd_{0.90}Tb_{0.10}F_3@PAA$ . **C)**  $Gd_{0.90}Tb_{0.10}F_3@PEG$ . **D)**  $Gd_{0.90}Tb_{0.10}F_3@SiO_2@PEG$ . Picture on the left as observed, picture on the right same area with schematic representation of the nanoparticles (black line) and the silica layer (red line).

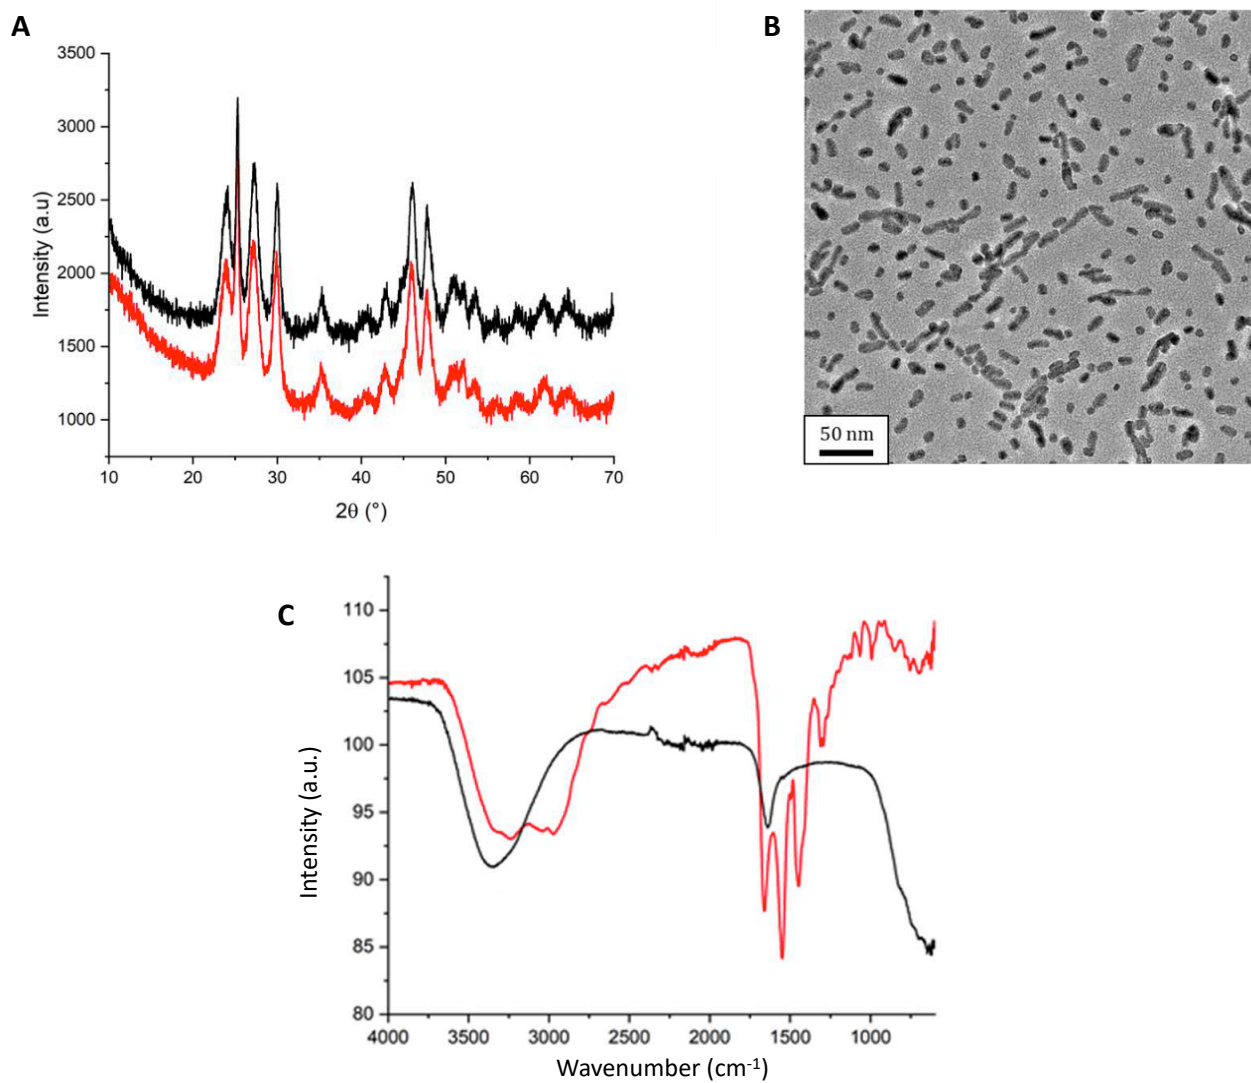

**Fig S8. A)** PXRD of  $Gd_{0.90}Tb_{0.10}F_3$  before (red line) and after (black line) cleaning treatment of the remaining 2-pyrrolidinone. **B)** TEM picture of cleaned  $Gd_{0.90}Tb_{0.10}F_3$ . **C)** FTIR spectra of  $Gd_{0.90}Tb_{0.10}F_3$  before (red line) and after (black line) cleaning treatment of the remaining 2-pyrrolidinone.

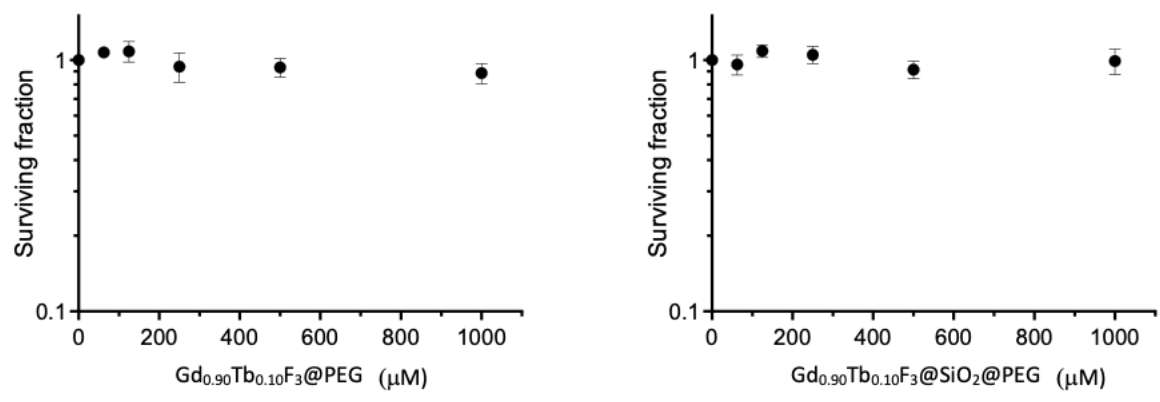

**Fig S9.** Surviving fraction of clonogenic MDA-MB-231 breast cancer cells upon treatment with the range of nanohybrids concentration for 24 h. Mean of 3 biological repeats  $\pm$  SD.
